# Supplementary material for: Multivalency of PEG-thiol ligands affects the stability of NIR-absorbing hollow gold nanospheres and gold nanorods
Source: Royal Society of Chemistry journal article supplement (doi:10.1039/c6tb00674d), 2016-01-01
Supplement: c6tb00674d1.pdf [file c6tb00674d1.pdf]

## **Multivalency of PEG-Thiol Ligands Affects the Stability of NIR-absorbing Hollow Gold Nanospheres and Gold Nanorods**

*Julie Ruff<sup>\*a</sup>, Julia Steitz<sup>b</sup>, Anne Buchkremer<sup>a</sup>, Michael Noyong<sup>a</sup>, Heinrich Hartmann<sup>c</sup>, Astrid Besmehn<sup>c</sup>, Ulrich Simon<sup>\*a</sup>*

<sup>a</sup> Institute of Inorganic Chemistry, RWTH Aachen University, Aachen, Germany

<sup>b</sup> Institute for Laboratory Animal Science, University Hospital of the RWTH Aachen University, Aachen, Germany

<sup>c</sup> Central Institute for Engineering, Electronics and Analytics (ZEA-3), Forschungszentrum Jülich GmbH, D-52425 Jülich, Germany

### **SUPPORTING INFORMATION**

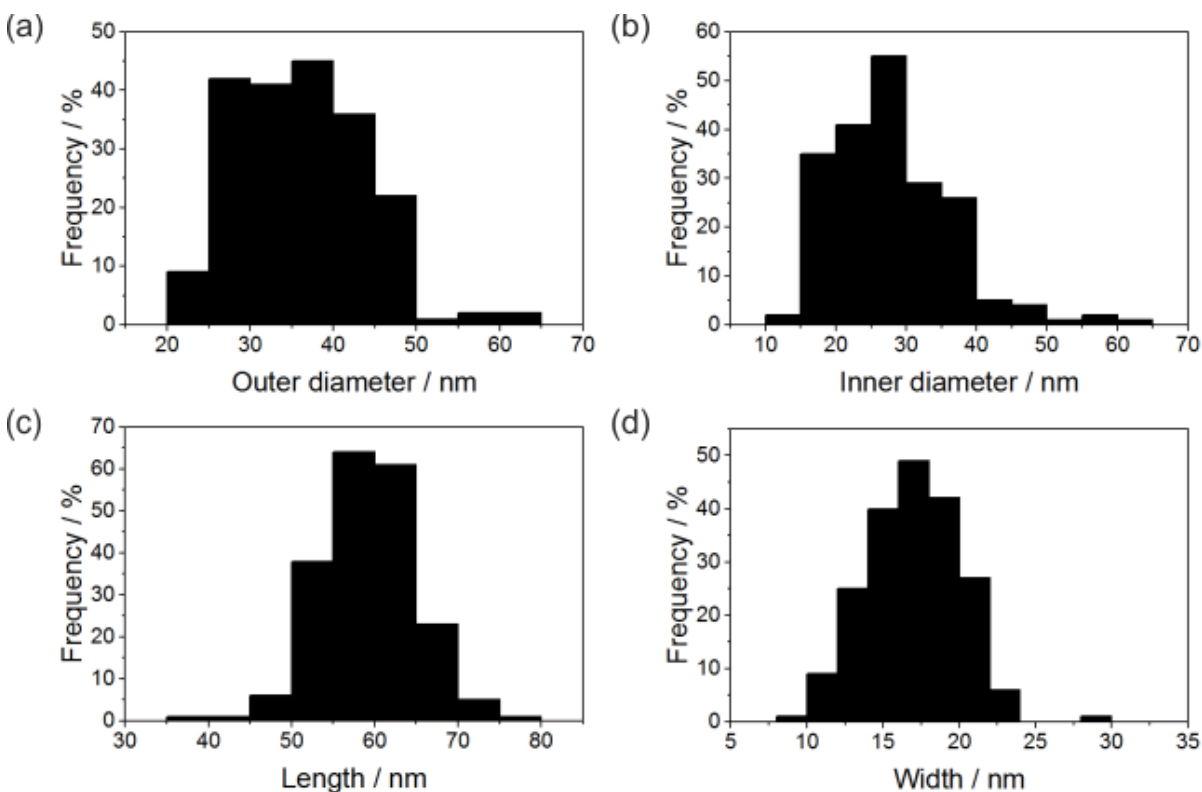

**Figure S1.** Histograms corresponding to the evaluation of the SEM-T images for HAuNS with (a) a shell diameter of  $35 \pm 6$  nm and (b) and inner diameter of  $28 \pm 8$  nm resulting in a shell thickness of  $5 \pm 4$  nm and for AuNR with (c) the length of  $59 \pm 6$  nm and a width of  $17 \pm 3$  nm.

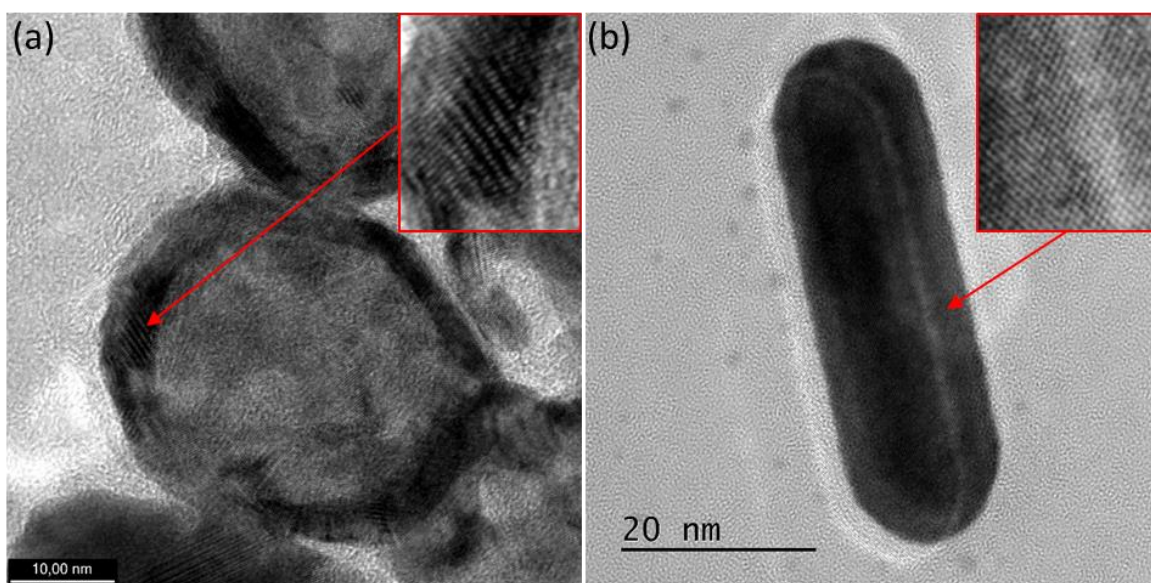

**Figure S2.** HR-TEM images of (a) HAuNS with an outer diameter of  $35 \pm 3$  nm, an inner diameter of  $27 \pm 2$  nm and a shell thickness of  $4 \pm 1$  nm and of (b) AuNR with a length of  $59 \pm 6$  nm and a width from  $17 \pm 2$  nm. The insets show exemplary a crystalline domain in a larger magnification.

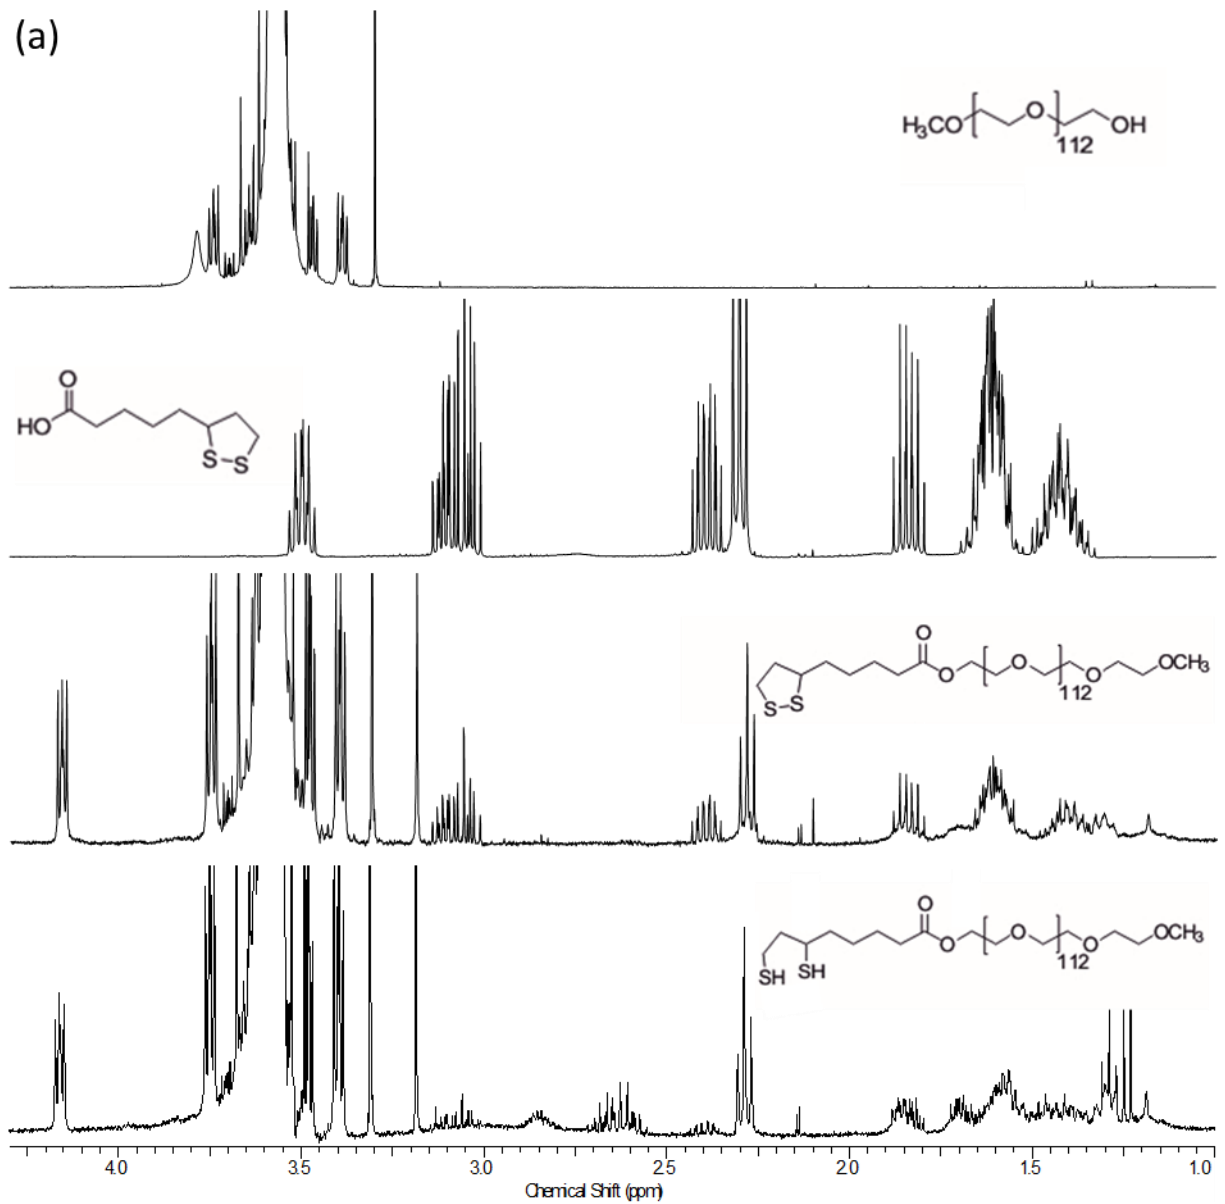

**Figure S3a.**  $^1\text{H}$ -NMR spectrum from up to down of PEG<sub>5000</sub> methyl ether, lipiolic acid, bidentate (HS)<sub>2</sub>-PEG<sub>5000</sub>-OCH<sub>3</sub> prior to ring opening and bidentate (HS)<sub>2</sub>-PEG<sub>5000</sub>-OCH<sub>3</sub> after ring opening.

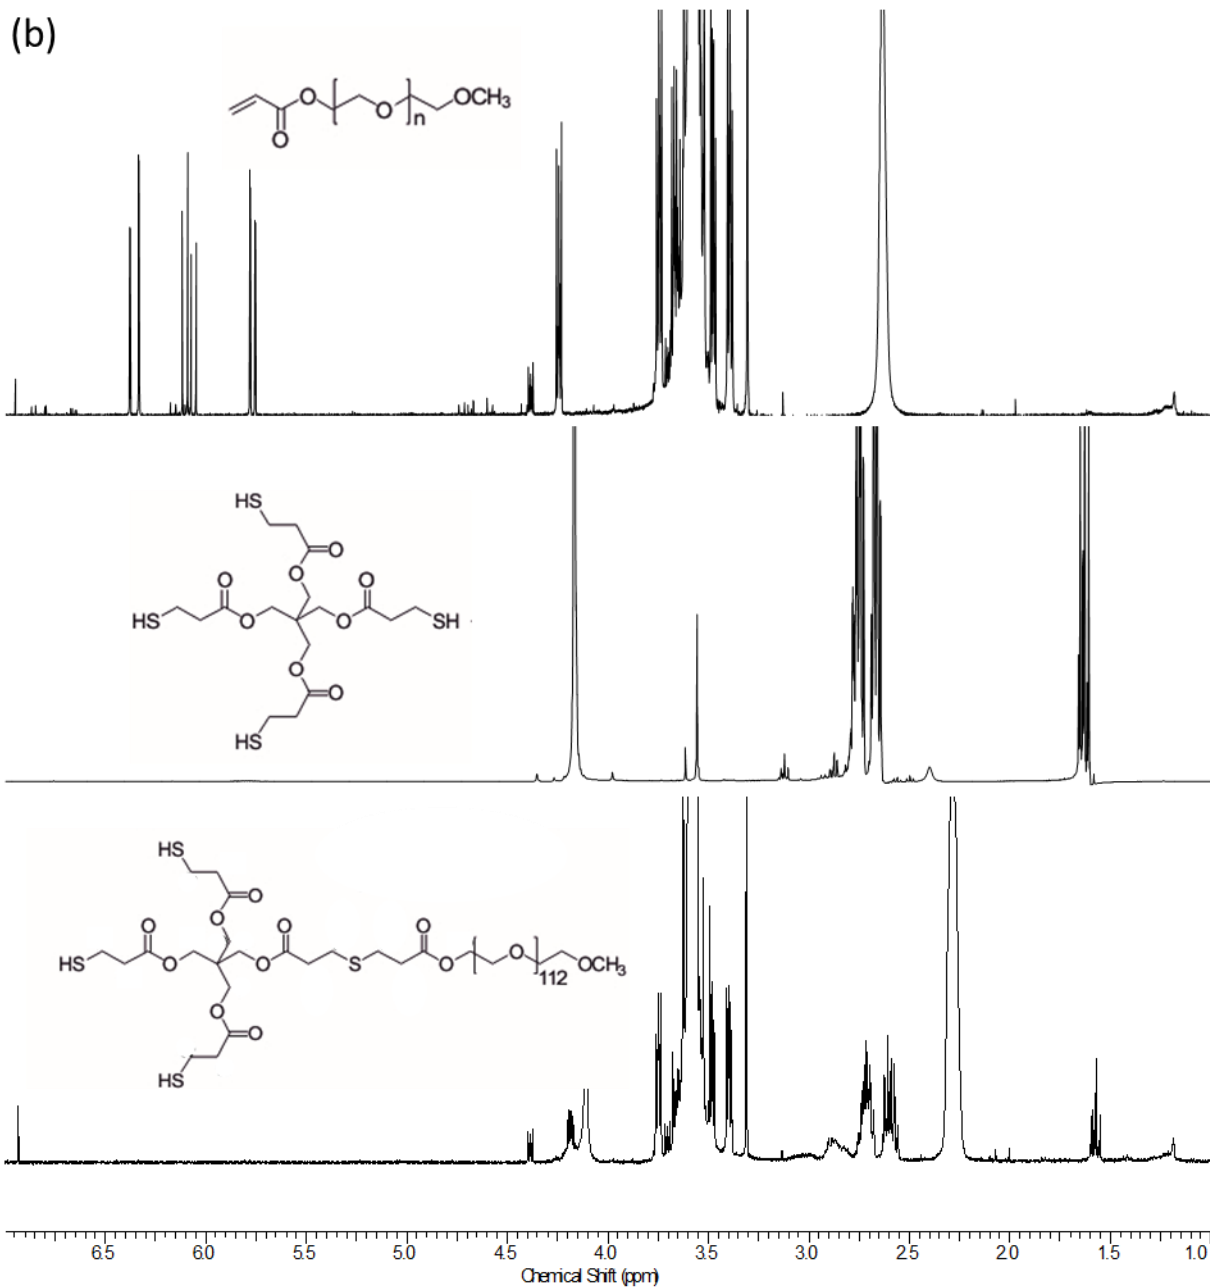

**Figure S3b.**  $^1\text{H-NMR}$  spectrum from up to down of PEG<sub>5000</sub> methyl ether acrylate, pentaerythritol tetrakis(3-mercaptopropionate) (PETM) and (HS)<sub>3</sub>-PEG<sub>5000</sub>-OCH<sub>3</sub>.

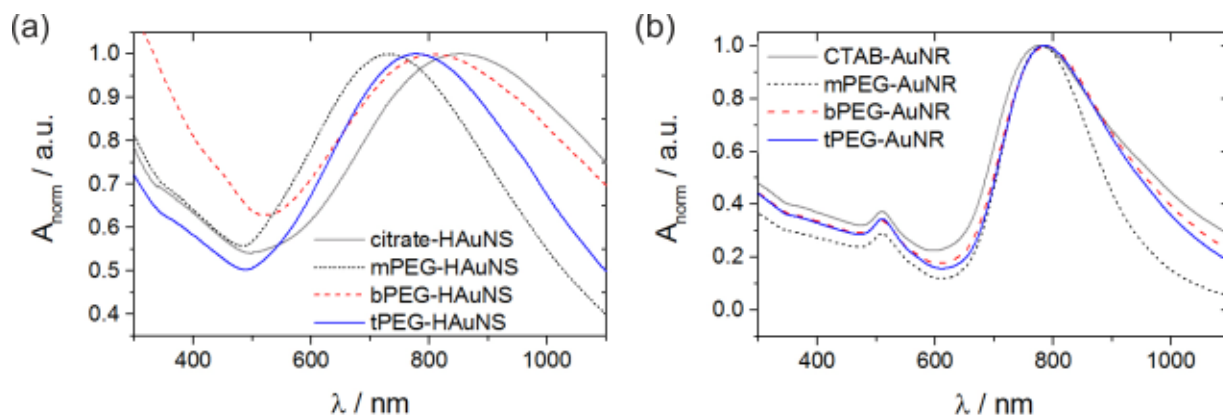

**Figure S4.** Optical characterization of PEGylated HAuNS and AuNR. (a) Absorbance spectra of HAuNS with a maximum absorbance at 852 nm (citrate-HAuNS), 735 nm (mPEG-HAuNS), 807 nm (bPEG-HAuNS) and 779 nm (tPEG-HAuNS). (b) Absorbance spectra of AuNR with a longitudinal maximum absorbance at 787 nm (CTAB-AuNR), 781 nm (mPEG-AuNR), 789 nm (bPEG-AuNR) and 786 nm (tPEG-AuNR).

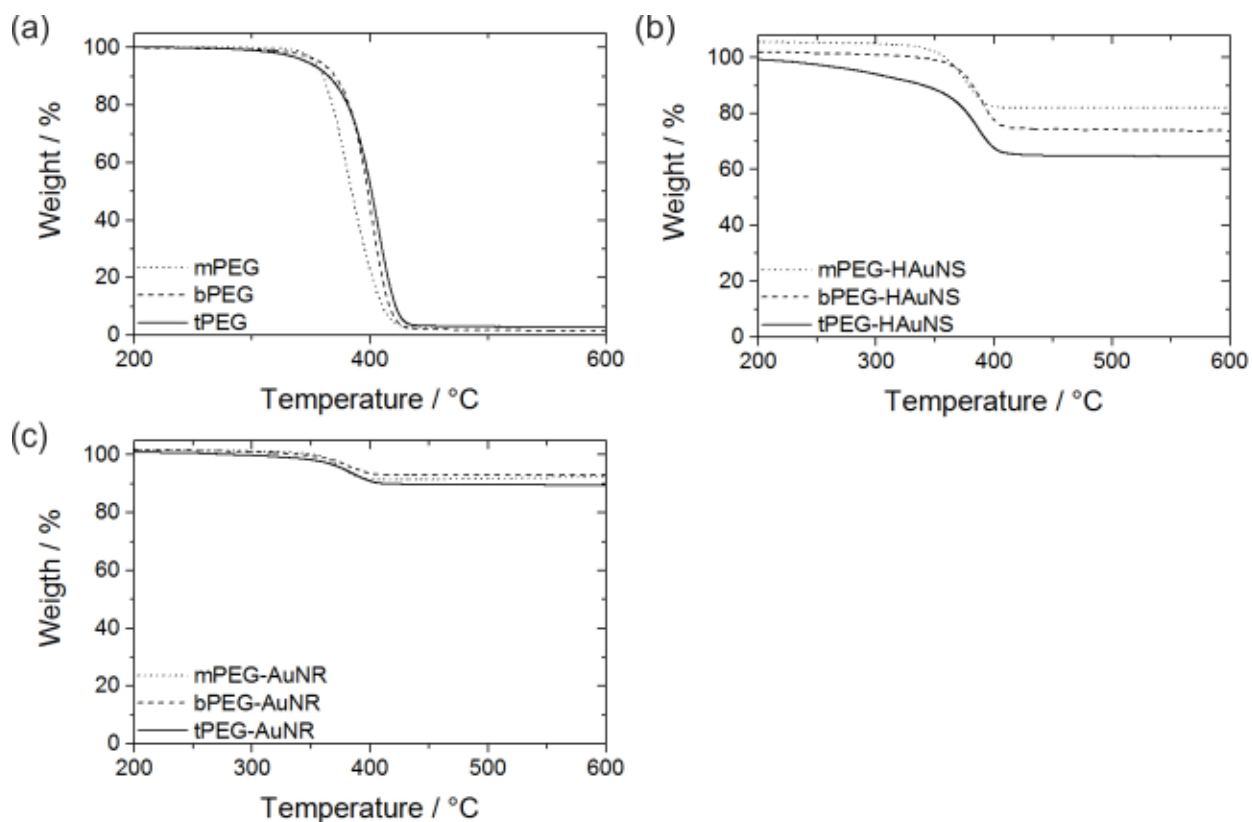

**Figure S5.** TGA of pure ligands and PEGylated AuNP. TGA of (a) the pure ligands HS-PEG<sub>5000</sub>-OCH<sub>3</sub>, HS<sub>2</sub>-PEG<sub>5000</sub>-OCH<sub>3</sub> and HS<sub>3</sub>-PEG<sub>5000</sub>-OCH<sub>3</sub>; the PEGylated particles (b) mPEG-HAuNS, bPEG-HAuNS, tPEG-HAuNS and (c) mPEG-AuNR, bPEG-AuNR and tPEG-AuNR are presented.

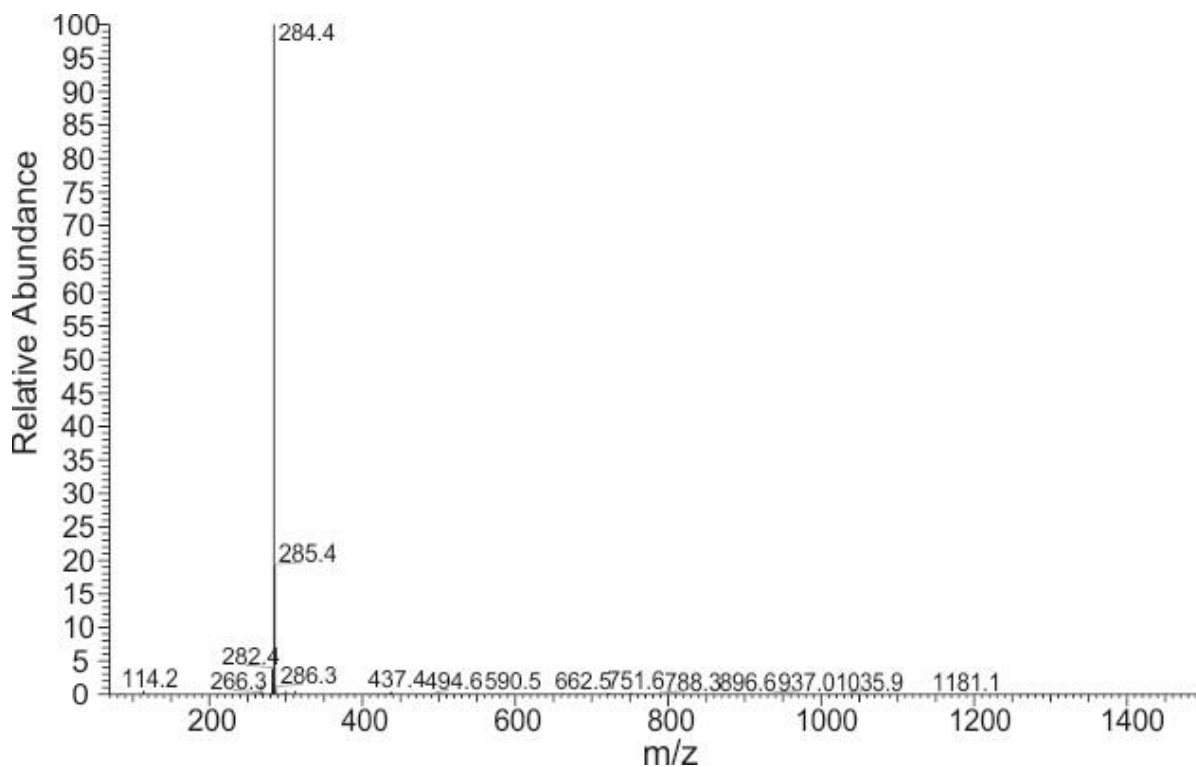

**Figure S6a.** SIMS spectrum of CTAB-AuNR. The mass peak of  $m/z = 284$  can be attributed to the cetyltrimethylammonium cation ( $C_{19}H_{42}N^+$ ).

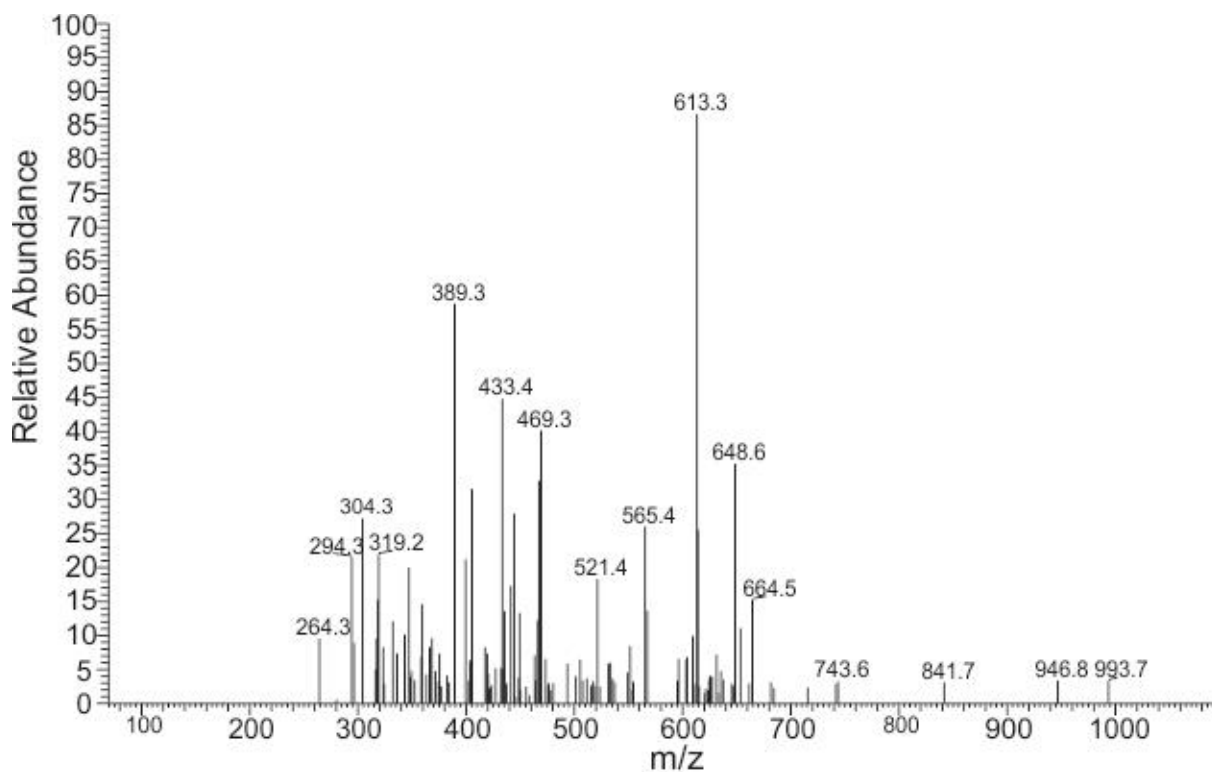

**Figure S6b.** SIMS spectrum of mPEG-AuNR.

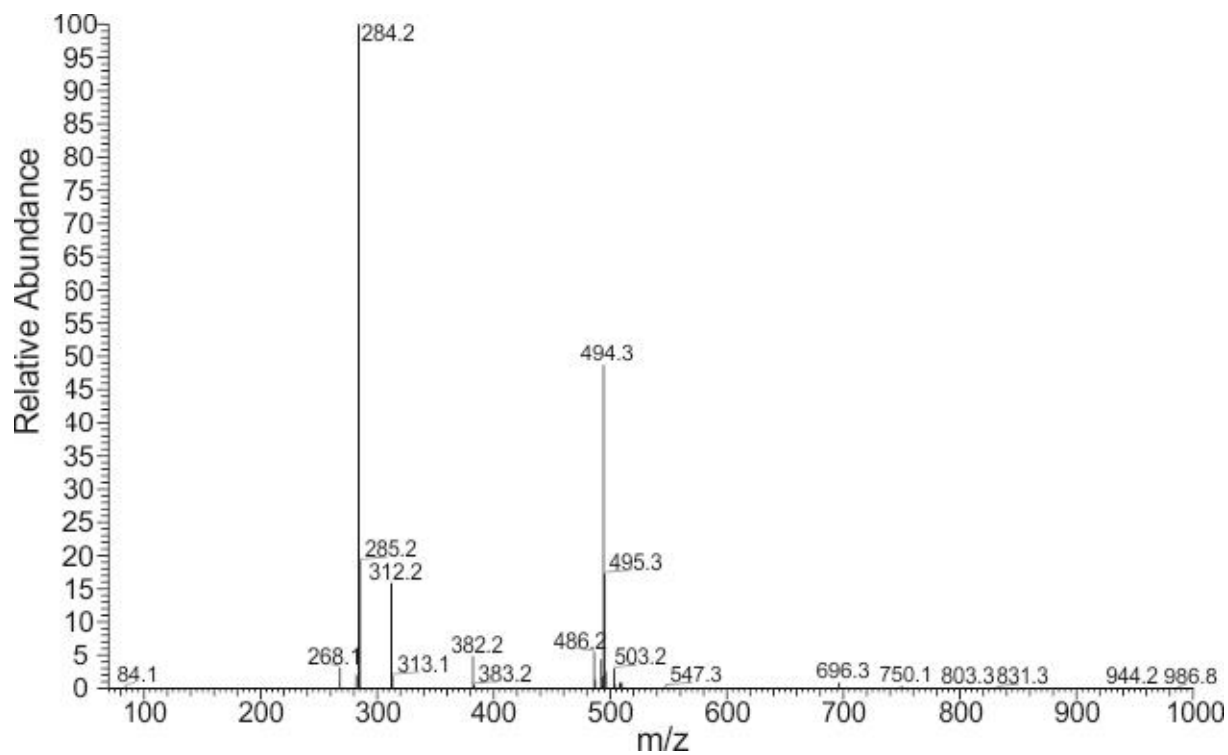

Figure S6c. SIMS spectrum of bPEG-AuNR.

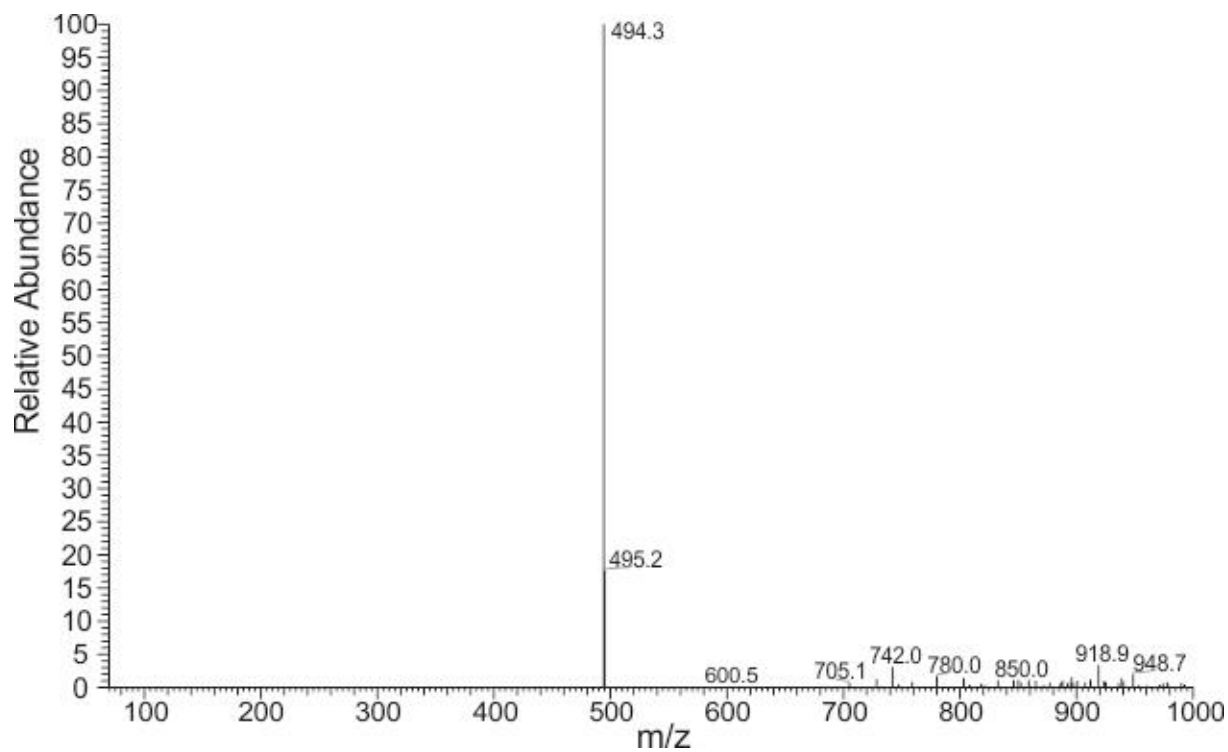

Figure S6d. SIMS spectrum of tPEG-AuNR.

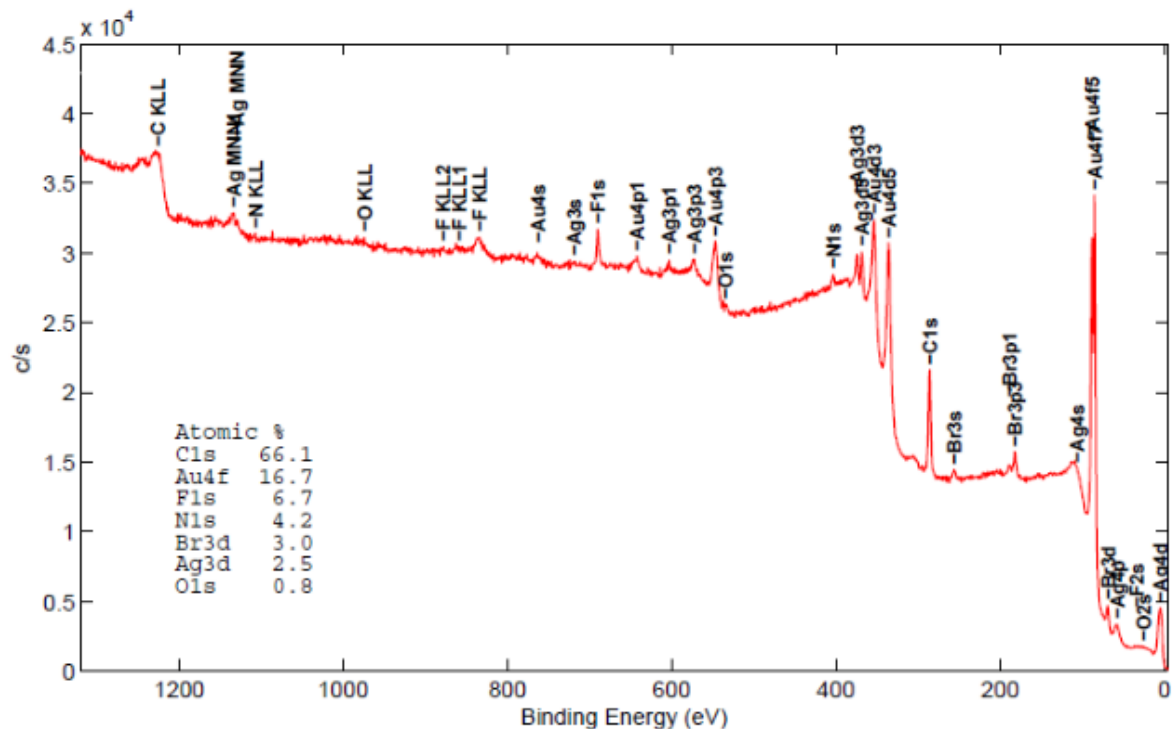

**Figure S7a.** Overview XPS spectrum of CTAB-AuNR. Spectrum were recorded at 187.5 eV pass energy and a step size of 0.8 eV and evaluated with *Phi MultiPak*.

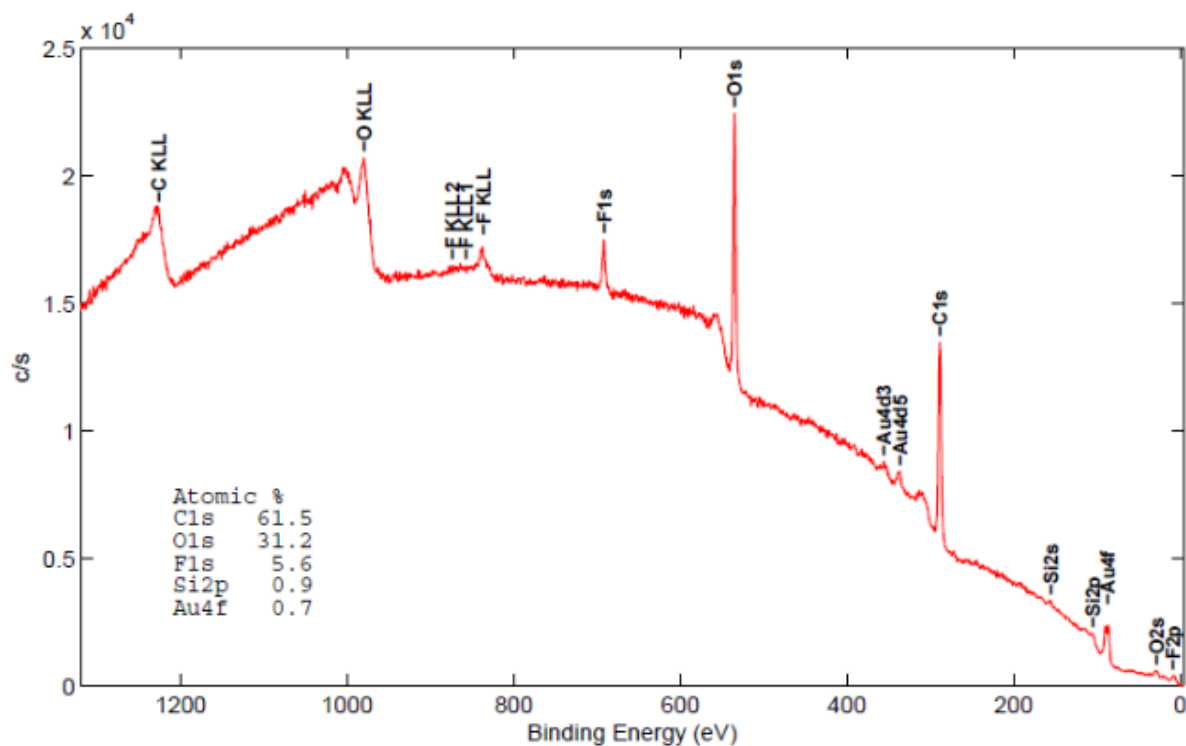

**Figure S7b.** Overview XPS spectrum of mPEG-AuNR. Spectrum were recorded at 187.5 eV pass energy and a step size of 0.8 eV and evaluated with *Phi MultiPak*.



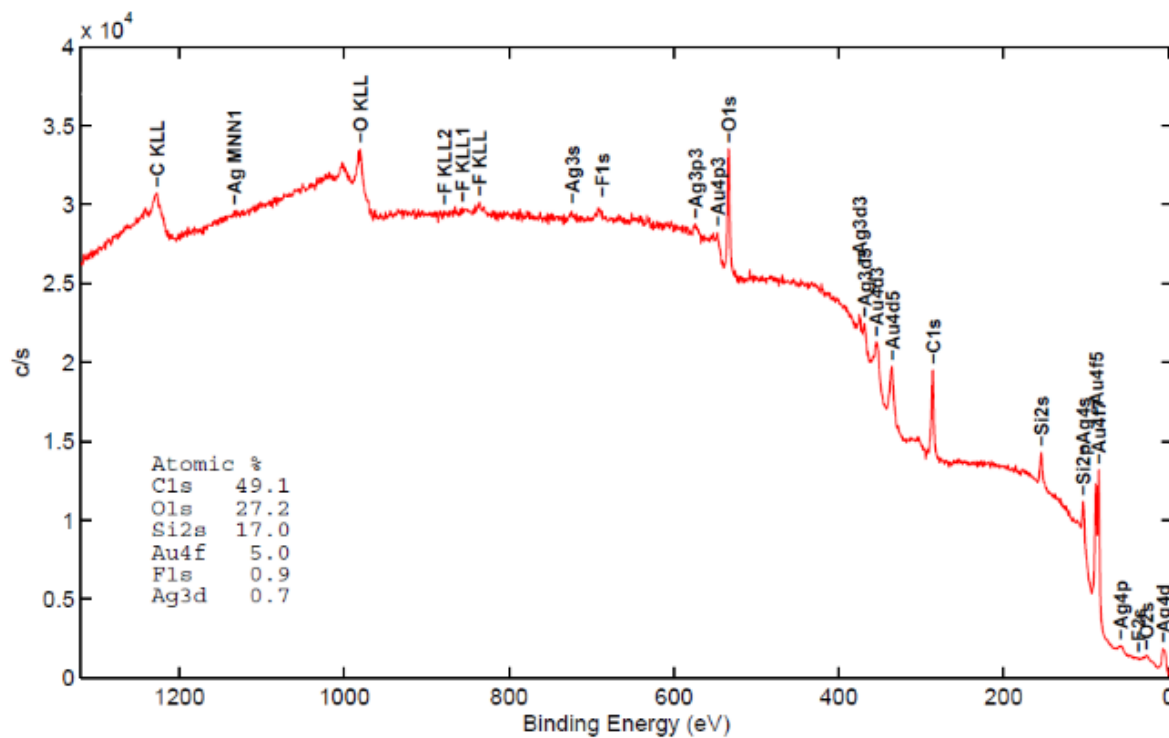

**Figure S7c.** Overview XPS spectrum of bPEG-AuNR. Spectrum were recorded at 187.5 eV pass energy and a step size of 0.8 eV and evaluated with *Phi MultiPak*.

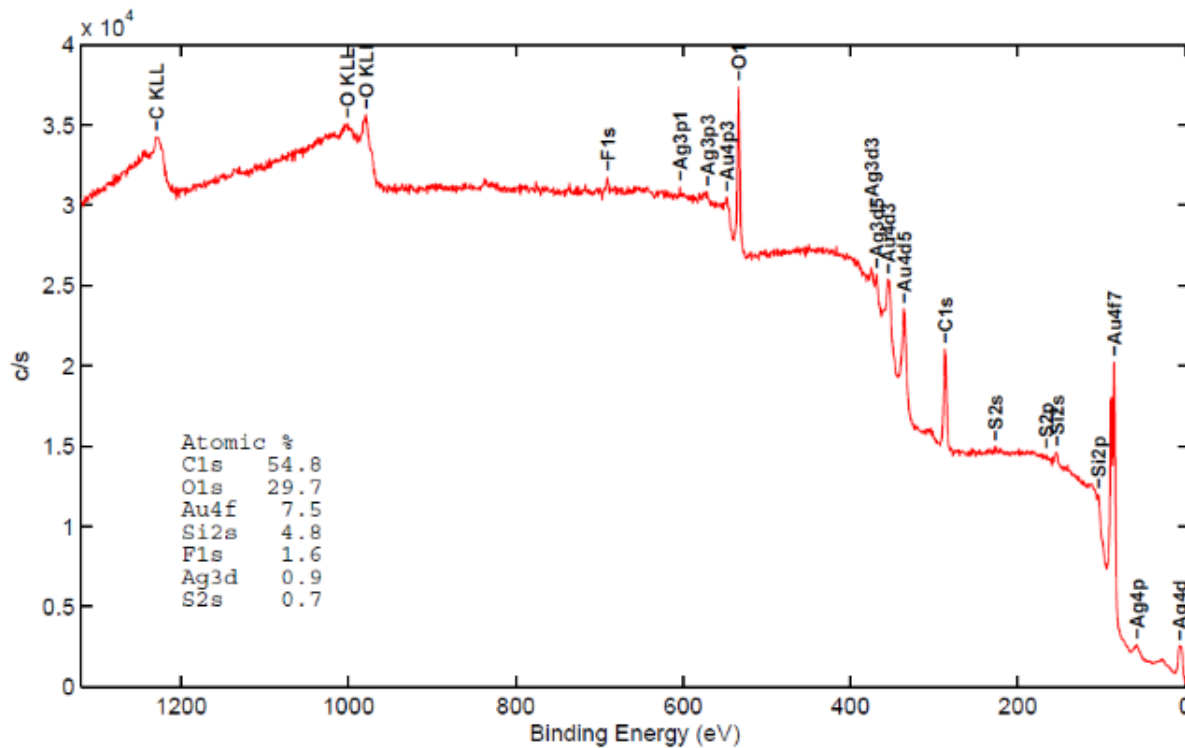

**Figure S7d.** Overview XPS spectrum of tPEG-AuNR. Spectrum were recorded at 187.5 eV pass energy and a step size of 0.8 eV and evaluated with *Phi MultiPak*.

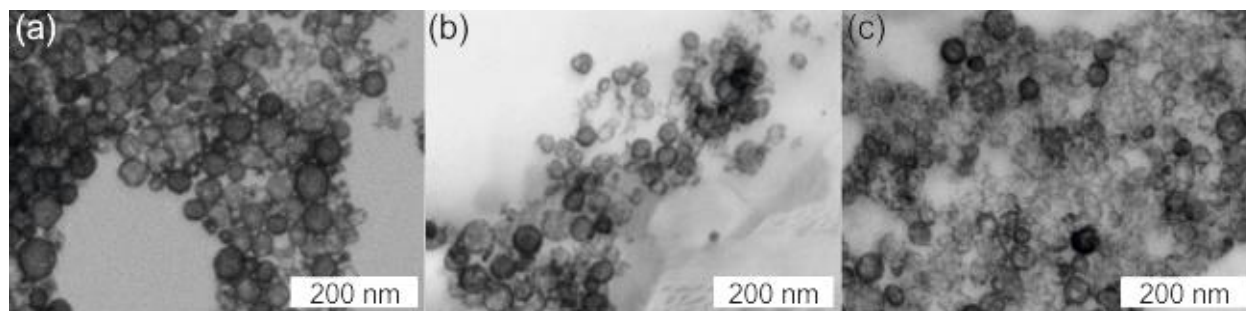

**Figure S8. Etching process of HAuNS.** SEM-T imaged of mPEG-HAuNS (a) before the addition of KCN, (b) 15 min after the addition of KCN and (c) 60 min after the addition of KCN.

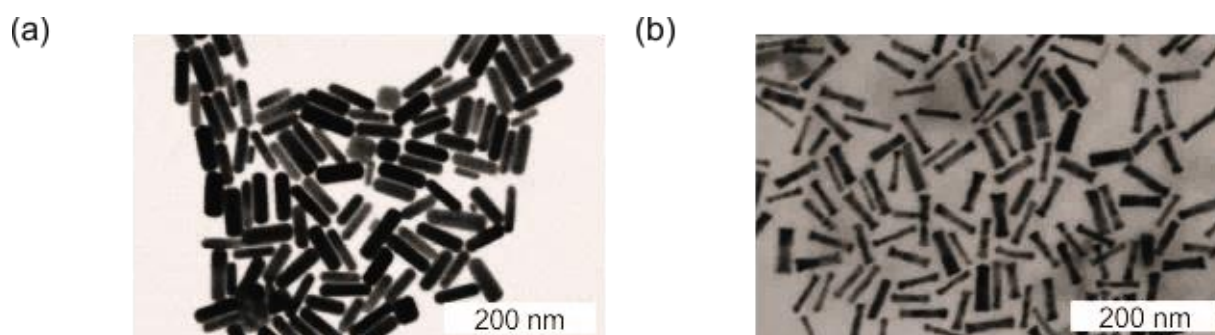

**Figure S9. Etching process of AuNR.** SEM-T imaged of mPEG-AuNR (a) before the addition of KCN and (b) 90 min after the addition of KCN.

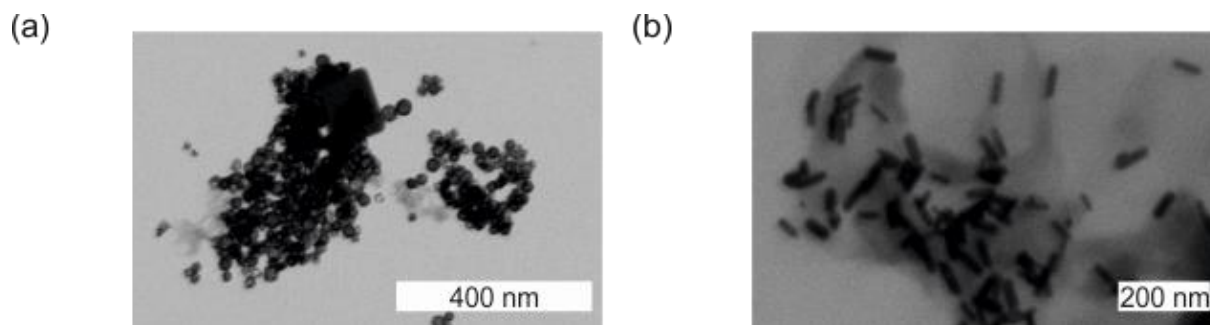

**Figure S10. Morphological stability** of (a) mPEG-HAuNS and (b) mPEG-AuNR after aggregation in 1 M NaCl solution.

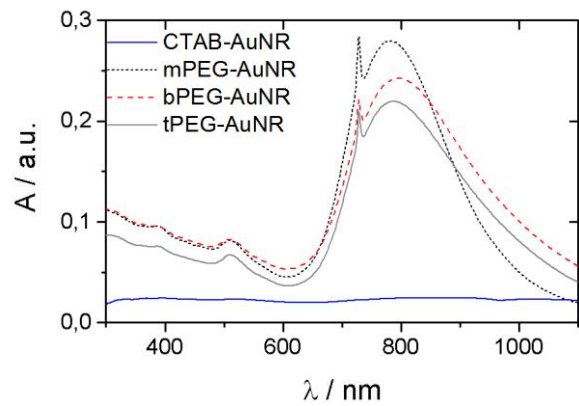

**Figure S11.** CTAB-AuNR and mPEG-, bPEG- and tPEG-AuNR in cell culture medium DMEM after 96 h.
